# Supplementary material
Source: PubMed Central journal article supplement (PMC10592522)
Supplement: NIHMS1909019-supplement-Supplemental_Material_2.pdf [file NIHMS1909019-supplement-Supplemental_Material_2.pdf]

The Role of Therapy Delivery and Clinic Organizational Factors in Explaining Therapist Effects for Trauma Focused Psychotherapies in the Veterans Health Administration

Supplemental Materials 2

**Appendix A** Estimated Variance Components for Random Effects and Odds Ratios for Fixed Effects for Base Model for Dropout with the Addition of Session Spacing Intensity

| Random Effects                                     | Estimate     | SE                    | Proportion of Variance | p                 |
|----------------------------------------------------|--------------|-----------------------|------------------------|-------------------|
| <b>Therapist, <math>\sigma^2_T</math></b>          | <b>0.107</b> | <b>0.057</b>          | <b>3.162%</b>          | <b>0.019</b>      |
| Fixed Effects                                      |              |                       |                        |                   |
|                                                    | OR           | [95% CI]              |                        | p                 |
| <b>PE (ref.: CPT)</b>                              | <b>1.287</b> | <b>[1.012, 1.637]</b> |                        | <b>0.039</b>      |
| <b>Age (mean centered)</b>                         | <b>0.986</b> | <b>[0.977, 0.995]</b> |                        | <b>0.001</b>      |
| Race (ref.: all other)                             |              |                       |                        |                   |
| Black/African American                             | 1.255        | [0.981, 1.606]        |                        | 0.071             |
| Multiracial                                        | 2.040        | [0.678, 6.144]        |                        | 0.205             |
| Ethnicity (ref.: Hispanic)                         |              |                       |                        |                   |
| not Hispanic                                       | 0.746        | [0.523, 1.064]        |                        | 0.106             |
| missing                                            | 0.698        | [0.388, 1.257]        |                        | 0.231             |
| <b>Education (ref.: <math>\geq</math> college)</b> |              |                       |                        |                   |
| <b><math>\leq</math> High school</b>               | <b>1.495</b> | <b>[1.103, 2.028]</b> |                        | <b>0.010</b>      |
| Some college or trade school                       | 1.283        | [0.977, 1.686]        |                        | 0.073             |
| <b>missing</b>                                     | <b>1.344</b> | <b>[1.007, 1.795]</b> |                        | <b>0.045</b>      |
| Employment (ref.: all other)                       |              |                       |                        |                   |
| retired                                            | 0.791        | [0.558, 1.121]        |                        | 0.187             |
| Trauma history (ref.: no multiple trauma)          |              |                       |                        |                   |
| Multiple trauma                                    | 1.148        | [0.931, 1.415]        |                        | 0.195             |
| Index trauma (ref.: all other)                     |              |                       |                        |                   |
| Other or missing                                   | 1.143        | [0.893, 1.462]        |                        | 0.288             |
| Pandemic period (ref.: pre-pandemic)               |              |                       |                        |                   |
| <b>Early pandemic</b>                              | <b>2.008</b> | <b>[1.528, 2.639]</b> |                        | <b>&lt; 0.001</b> |
| During pandemic                                    | 1.153        | [0.911, 1.459]        |                        | 0.235             |
| <b>Session spacing intensity</b>                   | <b>1.129</b> | <b>[1.081, 1.179]</b> |                        | <b>&lt; 0.001</b> |

Note. PE = prolonged exposure; CPT = cognitive processing therapy. Race reference group = White, Native American, Asian, Hawaiian, and missing. Employment reference group = employed, unemployed and missing. Index trauma reference group = combat military sexual trauma, other sexual trauma, and multiple sources. Bold indicates statistically significant effects.

**Appendix B.** *Estimated Variance Components for Random Effects and Odds Ratios for Fixed Effects for Base Model for Dropout with the Addition of Session Spacing Consistency*

| Random Effects                                     | <i>Estimate</i> | <i>SE</i>             | Proportion of Variance | <i>p</i>          |
|----------------------------------------------------|-----------------|-----------------------|------------------------|-------------------|
| <b>Therapist, <math>\sigma^2_{\tau}</math></b>     | <b>0.155</b>    | <b>0.060</b>          | <b>4.509%</b>          | <b>0.002</b>      |
| Fixed Effects                                      |                 |                       |                        |                   |
|                                                    | <i>OR</i>       | [95% CI]              |                        | <i>p</i>          |
| <b>PE (ref.: CPT)</b>                              | <b>1.286</b>    | <b>[1.009, 1.640]</b> |                        | <b>0.042</b>      |
| <b>Age (mean centered)</b>                         | <b>0.986</b>    | <b>[0.977, 0.994]</b> |                        | <b>0.001</b>      |
| Race (ref.: all other)                             |                 |                       |                        |                   |
| Black/African American                             | 1.258           | [0.981, 1.613]        |                        | 0.071             |
| Multiracial                                        | 2.061           | [0.680, 6.247]        |                        | 0.201             |
| Ethnicity (ref.: Hispanic)                         |                 |                       |                        |                   |
| not Hispanic                                       | 0.760           | [0.531, 1.087]        |                        | 0.133             |
| missing                                            | 0.694           | [0.384, 1.254]        |                        | 0.226             |
| <b>Education (ref.: <math>\geq</math> college)</b> |                 |                       |                        |                   |
| <b><math>\leq</math> High school</b>               | <b>1.521</b>    | <b>[1.121, 2.064]</b> |                        | <b>0.007</b>      |
| Some college or trade school                       | 1.304           | [0.992, 1.714]        |                        | 0.057             |
| <b>missing</b>                                     | <b>1.404</b>    | <b>[1.051, 1.876]</b> |                        | <b>0.022</b>      |
| Employment (ref.: all other)                       |                 |                       |                        |                   |
| retired                                            | 0.791           | [0.558, 1.122]        |                        | 0.189             |
| Trauma history (ref.: no multiple trauma)          |                 |                       |                        |                   |
| Multiple trauma                                    | 1.143           | [0.927, 1.410]        |                        | 0.212             |
| Index trauma (ref.: all other)                     |                 |                       |                        |                   |
| Other or missing                                   | 1.155           | [0.902, 1.479]        |                        | 0.252             |
| <b>Pandemic period (ref.: pre-pandemic)</b>        |                 |                       |                        |                   |
| <b>Early pandemic</b>                              | <b>2.026</b>    | <b>[1.541, 2.665]</b> |                        | <b>&lt; 0.001</b> |
| During pandemic                                    | 1.134           | [0.896, 1.437]        |                        | 0.295             |
| <b>Session spacing consistency</b>                 | <b>1.085</b>    | <b>[1.028, 1.145]</b> |                        | <b>0.003</b>      |

*Note.* PE = prolonged exposure; CPT = cognitive processing therapy. Race reference group = White, Native American, Asian, Hawaiian, and missing. Employment reference group = employed, unemployed and missing. Index trauma reference group = combat military sexual trauma, other sexual trauma, and multiple sources. Bold indicates statistically significant effects.

**Appendix C. Estimated Variance Components for Random Effects and Odds Ratios for Fixed Effects for Base Model for Dropout with the Addition of Adherence**

| Random Effects                                     | <i>Estimate</i> | <i>SE</i>             | Proportion of Variance | <i>p</i>          |
|----------------------------------------------------|-----------------|-----------------------|------------------------|-------------------|
| <b>Therapist, <math>\sigma^2_{\tau}</math></b>     | <b>0.193</b>    | <b>0.070</b>          | <b>5.530%</b>          | <b>&lt; 0.001</b> |
| Fixed Effects                                      |                 |                       |                        |                   |
|                                                    | <i>OR</i>       | [95% CI]              |                        | <i>p</i>          |
| PE (ref.: CPT)                                     | 1.231           | [0.958, 1.582]        |                        | 0.104             |
| <b>Age (mean centered)</b>                         | <b>0.986</b>    | <b>[0.978, 0.995]</b> |                        | <b>0.002</b>      |
| Race (ref.: all other)                             |                 |                       |                        |                   |
| Black                                              | 1.275           | [0.993, 1.637]        |                        | 0.057             |
| Multiracial                                        | 2.143           | [0.702, 6.541]        |                        | 0.181             |
| Ethnicity (ref.: Hispanic)                         |                 |                       |                        |                   |
| not Hispanic                                       | 0.775           | [0.527, 1.083]        |                        | 0.127             |
| missing                                            | 0.684           | [0.378, 1.239]        |                        | 0.211             |
| <b>Education (ref.: <math>\geq</math> college)</b> |                 |                       |                        |                   |
| <b><math>\leq</math> High school</b>               | <b>1.534</b>    | <b>[1.130, 2.084]</b> |                        | <b>0.006</b>      |
| <b>Some college or trade school</b>                | <b>1.336</b>    | <b>[1.016, 1.757]</b> |                        | <b>0.038</b>      |
| <b>missing</b>                                     | <b>1.434</b>    | <b>[1.072, 1.918]</b> |                        | <b>0.015</b>      |
| Employment (ref.: all other)                       |                 |                       |                        |                   |
| retired                                            | 0.789           | [0.556, 1.120]        |                        | 0.185             |
| Trauma history (ref.: no multiple trauma)          |                 |                       |                        |                   |
| Multiple trauma                                    | 1.155           | [0.936, 1.425]        |                        | 0.180             |
| Index trauma (ref.: all other)                     |                 |                       |                        |                   |
| Other or missing                                   | 1.170           | [0.913, 1.501]        |                        | 0.215             |
| <b>Pandemic period (ref.: pre-pandemic)</b>        |                 |                       |                        |                   |
| <b>Early pandemic</b>                              | <b>1.994</b>    | <b>[1.515, 2.624]</b> |                        | <b>&lt; 0.001</b> |
| During pandemic                                    | 1.118           | [0.882, 1.417]        |                        | 0.358             |
| Adherence (mean centered)                          | 0.933           | [0.818, 1.064]        |                        | 0.299             |

*Note.* PE = prolonged exposure; CPT = cognitive processing therapy. Race reference group = White, Native American, Asian, Hawaiian, and missing. Employment reference group = employed, unemployed and missing. Index trauma reference group = combat military sexual trauma, other sexual trauma, and multiple sources. Bold indicates statistically significant effects.

**Appendix D.** *Estimated Variance Components for Random Effects and Odds Ratios for Fixed Effects for Base Model for Dropout with the Addition of Implementation Leadership Scores*

| Random Effects                                     | <i>Estimate</i> | <i>SE</i>             | Proportion of Variance | <i>p</i>          |
|----------------------------------------------------|-----------------|-----------------------|------------------------|-------------------|
| <b>Therapist, <math>\sigma^2_{\tau}</math></b>     | <b>0.195</b>    | <b>0.116</b>          | <b>5.609%</b>          | <b>&lt; 0.001</b> |
| Fixed Effects                                      |                 |                       |                        |                   |
|                                                    | <i>OR</i>       | [95% CI]              |                        | <i>p</i>          |
| PE (ref: CPT)                                      | 1.266           | [0.991, 1.618]        |                        | 0.059             |
| <b>Age (mean centered)</b>                         | <b>0.986</b>    | <b>[0.978, 0.995]</b> |                        | <b>0.002</b>      |
| Race (ref.: all other)                             |                 |                       |                        |                   |
| Black                                              | 1.281           | [0.997, 1.647]        |                        | 0.053             |
| Multiracial                                        | 2.188           | [0.716, 6.685]        |                        | 0.169             |
| Ethnicity (ref.: Hispanic)                         |                 |                       |                        |                   |
| not Hispanic                                       | 0.737           | [0.514, 1.058]        |                        | 0.098             |
| missing                                            | 0.685           | [0.378, 1.240]        |                        | 0.212             |
| <b>Education (ref.: <math>\geq</math> college)</b> |                 |                       |                        |                   |
| <b><math>\leq</math> High school</b>               | <b>1.482</b>    | <b>[1.090, 2.016]</b> |                        | <b>0.012</b>      |
| Some college or trade school                       | 1.309           | [0.994, 1.723]        |                        | 0.055             |
| <b>missing</b>                                     | <b>1.399</b>    | <b>[1.044, 1.874]</b> |                        | <b>0.024</b>      |
| Employment (ref.: employed or unclear)             |                 |                       |                        |                   |
| retired                                            | 0.789           | [0.555, 1.120]        |                        | 0.184             |
| Trauma history (ref.: no multiple trauma)          |                 |                       |                        |                   |
| Multiple trauma                                    | 1.148           | [0.930, 1.418]        |                        | 0.199             |
| Index trauma (ref.: all other)                     |                 |                       |                        |                   |
| Other or missing                                   | 1.136           | [0.886, 1.458]        |                        | 0.314             |
| <b>Pandemic period (ref.: pre-pandemic)</b>        |                 |                       |                        |                   |
| <b>Early pandemic</b>                              | <b>1.966</b>    | <b>[1.492, 2.590]</b> |                        | <b>&lt; 0.001</b> |
| During pandemic                                    | 1.115           | [0.879, 1.414]        |                        | 0.370             |
| Implementation leadership                          | 0.910           | [0.805, 1.028]        |                        | 0.129             |

*Note.* PE = prolonged exposure; CPT = cognitive processing therapy. Race reference group = White, Native American, Asian, Hawaiian, and missing. Employment reference group = employed, unemployed and missing. Index trauma reference group = combat military sexual trauma, other sexual trauma, and multiple sources. Bold indicates statistically significant effects.

**Appendix E.** *Estimated Variance Components for Random Effects and Odds Ratios for Fixed Effects for Base Model for Dropout with the Addition of Implementation Climate Scores*

| Random Effects                                     | <i>Estimate</i> | <i>SE</i>             | Proportion of Variance | <i>p</i>          |
|----------------------------------------------------|-----------------|-----------------------|------------------------|-------------------|
| <b>Therapist, <math>\sigma^2_{\tau}</math></b>     | <b>0.154</b>    | <b>0.052</b>          | <b>4.469%</b>          | <b>0.003</b>      |
| Fixed Effects                                      |                 |                       |                        |                   |
|                                                    | <i>OR</i>       | [95% CI]              |                        | <i>p</i>          |
| PE (ref: CPT)                                      | 1.275           | [1.000, 1.626]        |                        | 0.050             |
| <b>Age (mean centered)</b>                         | <b>0.986</b>    | <b>[0.978, 0.995]</b> |                        | <b>0.002</b>      |
| <b>Race (ref.: all other)</b>                      |                 |                       |                        |                   |
| <b>Black</b>                                       | <b>1.298</b>    | <b>[1.012, 1.664]</b> |                        | <b>0.040</b>      |
| Multiracial                                        | 2.198           | [0.723, 6.682]        |                        | 0.165             |
| Ethnicity (ref.: Hispanic)                         |                 |                       |                        |                   |
| not Hispanic                                       | 0.731           | [0.511, 1.047]        |                        | 0.087             |
| missing                                            | 0.694           | [0.384, 1.255]        |                        | 0.227             |
| <b>Education (ref.: <math>\geq</math> college)</b> |                 |                       |                        |                   |
| <b><math>\leq</math> High school</b>               | <b>1.515</b>    | <b>[1.117, 2.057]</b> |                        | <b>0.008</b>      |
| Some college or trade school                       | 1.311           | [0.998, 1.724]        |                        | 0.052             |
| <b>missing</b>                                     | <b>1.400</b>    | <b>[1.048, 1.872]</b> |                        | <b>0.023</b>      |
| Employment (ref.: all other)                       |                 |                       |                        |                   |
| retired                                            | 0.781           | [0.551, 1.108]        |                        | 0.166             |
| Trauma history (ref.: no multiple trauma)          |                 |                       |                        |                   |
| Multiple trauma                                    | 1.168           | [0.947, 1.440]        |                        | 0.148             |
| Index trauma (ref: all other)                      |                 |                       |                        |                   |
| Other or missing                                   | 1.128           | [0.881, 1.446]        |                        | 0.339             |
| <b>Pandemic period (ref.: pre-pandemic)</b>        |                 |                       |                        |                   |
| <b>Early pandemic</b>                              | <b>1.992</b>    | <b>[1.515, 2.619]</b> |                        | <b>&lt; 0.001</b> |
| During pandemic                                    | 1.137           | [0.898, 1.439]        |                        | 0.287             |
| <b>Implementation Climate</b>                      | <b>0.739</b>    | <b>[0.619, 0.882]</b> |                        | <b>0.001</b>      |

*Note.* PE = prolonged exposure; CPT = cognitive processing therapy. Race reference group = White, Native American, Asian, Hawaiian, and missing. Employment reference group = employed, unemployed and missing. Index trauma reference group = combat military sexual trauma, other sexual trauma, and multiple sources. Bold indicates statistically significant effects.

**Appendix F.** *Estimated Variance Components for Random Effects and Odds Ratios for Fixed Effects for Base Model for Dropout with the Addition of Monthly Caseload*

| Random Effects                                     | <i>Estimate</i> | <i>SE</i>             | Proportion of Variance | <i>p</i>          |
|----------------------------------------------------|-----------------|-----------------------|------------------------|-------------------|
| <b>Therapist, <math>\sigma^2_{\tau}</math></b>     | <b>0.188</b>    | <b>0.073</b>          | <b>5.396%</b>          | <b>&lt; 0.001</b> |
| Fixed Effects                                      |                 |                       |                        |                   |
|                                                    | <i>OR</i>       | [95% CI]              |                        | <i>p</i>          |
| PE (ref: CPT)                                      | 1.256           | [0.983, 1.604]        |                        | 0.068             |
| <b>Age (mean centered)</b>                         | <b>0.986</b>    | <b>[0.978, 0.995]</b> |                        | <b>0.002</b>      |
| Race (ref.: all other)                             |                 |                       |                        |                   |
| Black                                              | 1.271           | [0.990, 1.631]        |                        | 0.060             |
| Multiracial                                        | 2.124           | [0.697, 6.476]        |                        | 0.185             |
| Ethnicity (ref.: Hispanic)                         |                 |                       |                        |                   |
| not Hispanic                                       | 0.746           | [0.520, 1.069]        |                        | 0.110             |
| missing                                            | 0.691           | [0.382, 1.251]        |                        | 0.223             |
| <b>Education (ref.: <math>\geq</math> college)</b> |                 |                       |                        |                   |
| <b><math>\leq</math> High school</b>               | <b>1.532</b>    | <b>[1.128, 2.080]</b> |                        | <b>0.006</b>      |
| <b>Some college or trade school</b>                | <b>1.329</b>    | <b>[1.010, 1.747]</b> |                        | <b>0.042</b>      |
| <b>missing</b>                                     | <b>1.435</b>    | <b>[1.073, 1.919]</b> |                        | <b>0.015</b>      |
| Employment (ref.: all other)                       |                 |                       |                        |                   |
| retired                                            | 0.788           | [0.556, 1.118]        |                        | 0.182             |
| Trauma history (ref.: no multiple trauma)          |                 |                       |                        |                   |
| Multiple trauma                                    | 1.158           | [0.938, 1.428]        |                        | 0.172             |
| Index trauma (ref.: all other)                     |                 |                       |                        |                   |
| Other or missing                                   | 1.152           | [0.899, 1.476]        |                        | 0.265             |
| <b>Pandemic period (ref.: pre-pandemic)</b>        |                 |                       |                        |                   |
| <b>Early pandemic</b>                              | <b>2.005</b>    | <b>[1.523, 2.638]</b> |                        | <b>&lt; 0.001</b> |
| During pandemic                                    | 1.135           | [0.896, 1.439]        |                        | 0.294             |
| Monthly caseload                                   | 1.017           | [0.999, 1.036]        |                        | 0.071             |

*Note.* PE = prolonged exposure; CPT = cognitive processing therapy. Race reference group = White, Native American, Asian, Hawaiian, and missing. Employment reference group = employed, unemployed and missing. Index trauma reference group = combat military sexual trauma, other sexual trauma, and multiple sources. Bold indicates statistically significant effects.

**Appendix G.** *Estimated Variance Components for Random Effects and Odds Ratios for Fixed Effects for Base Model for Dropout with the Addition of PTSD Specialty Care Involvement*

| Random Effects                                     | <i>Estimate</i> | <i>SE</i>             | Proportion of Variance | <i>p</i>          |
|----------------------------------------------------|-----------------|-----------------------|------------------------|-------------------|
| <b>Therapist, <math>\sigma^2_{\tau}</math></b>     | <b>0.201</b>    | <b>0.074</b>          | <b>5.751%</b>          | <b>&lt; 0.001</b> |
| Fixed Effects                                      |                 |                       |                        |                   |
|                                                    | <i>OR</i>       | [95% CI]              |                        | <i>p</i>          |
| PE (ref.: CPT)                                     | 1.279           | [0.999, 1.638]        |                        | 0.051             |
| <b>Age (mean centered)</b>                         | <b>0.986</b>    | <b>[0.978, 0.995]</b> |                        | <b>0.002</b>      |
| Race (ref.: all other)                             |                 |                       |                        |                   |
| Black                                              | 1.280           | [0.996, 1.645]        |                        | 0.053             |
| Multiracial                                        | 2.145           | [0.702, 6.556]        |                        | 0.181             |
| Ethnicity (ref.: Hispanic)                         |                 |                       |                        |                   |
| not Hispanic                                       | 0.748           | [0.521, 1.073]        |                        | 0.114             |
| missing                                            | 0.684           | [0.378, 1.240]        |                        | 0.211             |
| <b>Education (ref.: <math>\geq</math> college)</b> |                 |                       |                        |                   |
| <b><math>\leq</math> High school</b>               | <b>1.526</b>    | <b>[1.123, 2.073]</b> |                        | <b>0.007</b>      |
| <b>Some college or trade school</b>                | <b>1.330</b>    | <b>[1.011, 1.750]</b> |                        | <b>0.041</b>      |
| <b>missing</b>                                     | <b>1.427</b>    | <b>[1.067, 1.910]</b> |                        | <b>0.017</b>      |
| Employment (ref.: all other)                       |                 |                       |                        |                   |
| retired                                            | 0.788           | [0.555, 1.118]        |                        | 0.182             |
| Trauma history (ref.: no multiple trauma)          |                 |                       |                        |                   |
| Multiple trauma                                    | 1.156           | [0.936, 1.426]        |                        | 0.178             |
| Index trauma (ref.: all other)                     |                 |                       |                        |                   |
| Other or missing                                   | 1.154           | [0.900, 1.480]        |                        | 0.258             |
| <b>Pandemic period (ref.: pre-pandemic)</b>        |                 |                       |                        |                   |
| <b>Early pandemic</b>                              | <b>1.999</b>    | <b>[1.518, 2.631]</b> |                        | <b>&lt; 0.001</b> |
| During pandemic                                    | 1.130           | [0.891, 1.433]        |                        | 0.315             |
| PTSD specialty care involvement                    | 0.910           | [0.705, 1.174]        |                        | 0.469             |

*Note.* PE = prolonged exposure; CPT = cognitive processing therapy. Race reference group = White, Native American, Asian, Hawaiian, and missing. Employment reference group = employed, unemployed and missing. Index trauma reference group = combat military sexual trauma, other sexual trauma, and multiple sources. Bold indicates statistically significant effects.

**Appendix H.** *Estimated Variance Components for Random Effects and Odds Ratios for Fixed Effects for Base Model for Dropout with the Addition of Session Spacing Intensity, Adherence, Implementation Climate and Caseload*

| Random Effects                                    | <i>Estimate</i> | <i>SE</i>             | Proportion of Variance | <i>p</i>          |
|---------------------------------------------------|-----------------|-----------------------|------------------------|-------------------|
| Therapist, $\sigma^2_T$                           | 0.068           | 0.046                 | 2.031%                 | 0.140             |
| Fixed Effects                                     |                 |                       |                        |                   |
|                                                   | <i>OR</i>       | [95% CI]              |                        | <i>p</i>          |
| PE (ref: CPT)                                     | 1.256           | [0.984, 1.604]        |                        | 0.067             |
| <b>Age (mean centered)</b>                        | <b>0.986</b>    | <b>[0.977, 0.994]</b> |                        | <b>0.001</b>      |
| Race (ref: all other)                             |                 |                       |                        |                   |
| Black                                             | 1.269           | [0.993, 1.621]        |                        | 0.057             |
| Multiracial                                       | 2.126           | [0.709, 6.373]        |                        | 0.178             |
| Ethnicity (ref.: Hispanic)                        |                 |                       |                        |                   |
| not Hispanic                                      | 0.734           | [0.516, 1.045]        |                        | 0.086             |
| missing                                           | 0.719           | [0.400, 1.292]        |                        | 0.270             |
| <b>Education (ref: <math>\geq</math> college)</b> |                 |                       |                        |                   |
| <b><math>\leq</math> High school</b>              | <b>1.491</b>    | <b>[1.100, 2.019]</b> |                        | <b>0.010</b>      |
| Some college or trade school                      | 1.275           | [0.972, 1.674]        |                        | 0.080             |
| missing                                           | 1.332           | [0.999, 1.777]        |                        | 0.051             |
| Employment (ref.: all other)                      |                 |                       |                        |                   |
| retired                                           | 0.782           | [0.553, 1.107]        |                        | 0.166             |
| Trauma history (ref.: no multiple trauma)         |                 |                       |                        |                   |
| Multiple trauma                                   | 1.161           | [0.943, 1.430]        |                        | 0.160             |
| Index trauma (ref.: all other)                    |                 |                       |                        |                   |
| Other or missing                                  | 1.120           | [0.875, 1.434]        |                        | 0.367             |
| <b>Pandemic period (ref.: pre-pandemic)</b>       |                 |                       |                        |                   |
| <b>Early pandemic</b>                             | <b>1.992</b>    | <b>[1.518, 2.614]</b> |                        | <b>&lt; 0.001</b> |
| During pandemic                                   | 1.168           | [0.924, 1.476]        |                        | 0.194             |
| <b>Session spacing intensity</b>                  | <b>1.114</b>    | <b>[1.067, 1.163]</b> |                        | <b>&lt; 0.001</b> |
| Adherence (mean centered)                         | 0.959           | [0.855, 1.076]        |                        | 0.473             |
| <b>Implementation climate</b>                     | <b>0.810</b>    | <b>[0.686, 0.956]</b> |                        | <b>0.013</b>      |
| Caseload                                          | 1.012           | [0.995, 1.029]        |                        | 0.174             |

*Note.* PE = prolonged exposure; CPT = cognitive processing therapy. Race reference group = White, Native American, Asian, Hawaiian, and missing. Employment reference group = employed, unemployed and missing. Index trauma reference group = combat military sexual trauma, other sexual trauma, and multiple sources. Bold indicates statistically significant effects.
